# Supplementary material
Source: PubMed Central journal article supplement (PMC2898352)
Supplement: supp_M110.126482_jbc.M110.126482-1.pdf [file supp_M110.126482_jbc.M110.126482-1.pdf]

## Supplemental Figures

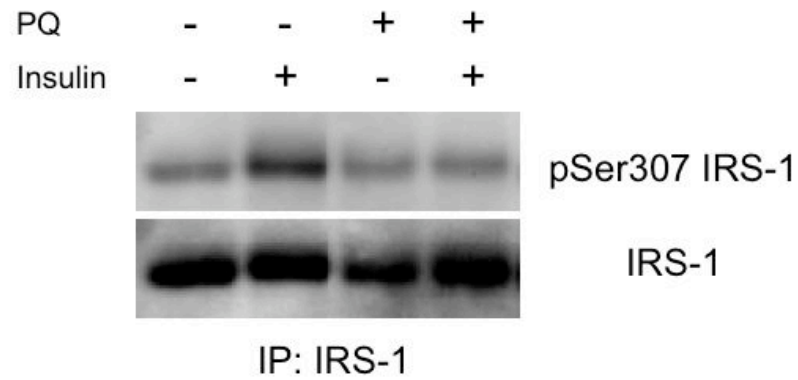

**Fig. S1 Effect of paraquat on phosphorylation of IRS-1.**

3T3-L1 adipocytes were serum-starved for 18 h and were then treated with 0 mM or 10 mM paraquat (PQ) for 3 h followed by incubation with 10 nM insulin for 5 min. Cells were then solubilized. Equal amounts of protein were subjected to SDS-PAGE and immunoblotting was performed with indicated antibody. Representative results of three independent experiments are shown.

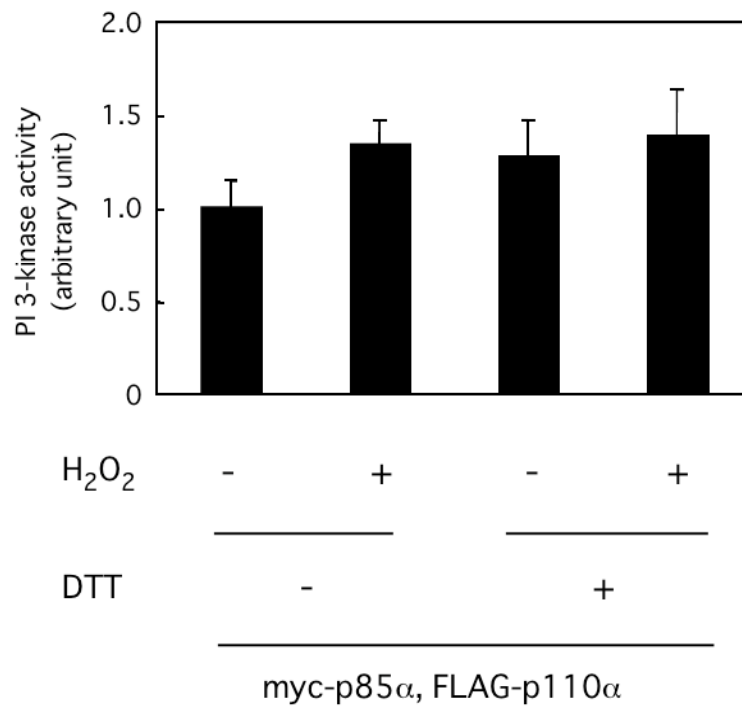

**Fig. S2 Effect of H<sub>2</sub>O<sub>2</sub>-treatment on PI 3-kinase activity of p110 $\alpha$  in cell-free system.**

p110 PI 3-kinase was immunoprecipitated with anti-FLAG antibody from HEK293T cells co-transfected with myc-p85 $\alpha$  and FLAG-p110 $\alpha$ . The immunoprecipitates were treated with 0.5 mM H<sub>2</sub>O<sub>2</sub> in lysis buffer for 1.5 h at 4°C. After washing the immunoprecipitates with lysis buffer, LiCl, distilled water, TNE buffer, and reaction buffer, PI 3-kinase assay were performed with or without DTT. The experiments were performed in triplicate, and the results are shown as the mean  $\pm$  SEM.
